# Supplementary material for: Kinetics and mechanism of the substitution behaviour of Pd(ii) piperazine complexes with different biologically relevant nucleophiles
Source: Royal Society of Chemistry journal article supplement (doi:10.1039/b706856e), 2007-01-01
Supplement: b706856e.pdf [file b706856e.pdf]

Electronic Supplementary Information for Dalton Transactions  
This journal is © The Royal Society of Chemistry 2007

## Supporting Information

### **Kinetics and mechanism of the substitution behaviour of Pd(II) piperazine complexes with different biologically relevant nucleophiles**

Azza Shoukry,<sup>a,b</sup> Malgorzata Brindell<sup>b,c</sup> and Rudi van Eldik<sup>b,\*</sup>

<sup>a</sup>Department of Chemistry, Faculty of Science, Cairo University, Egypt

<sup>b</sup>Institute for Inorganic Chemistry, University of Erlangen-Nürnberg, Egerlandstr. 1, 91058  
Erlangen, Germany                      [vaneldik@chemie.uni-erlangen.de](mailto:vaneldik@chemie.uni-erlangen.de)

<sup>c</sup>Department of Inorganic Chemistry, Faculty of Chemistry, Jagiellonian University, Ingardena 3,  
30-060 Krakow, Poland

**Table S1.** Summary of the rate constants at various temperature and activation parameters for the reaction of  $[\text{Pd}(\text{Pip})(\text{H}_2\text{O})_2]^{2+}$  with 5'-GMP, L-Met and tu,  $I = 0.1 \text{ M}$ .

| Nu     | T/°C                                                  | $k_1 \times 10^{-3} / \text{M}^{-1}\text{s}^{-1}$     | $k_{-1} / \text{s}^{-1}$ | $k_2 / \text{M}^{-1}\text{s}^{-1}$ | $k_{-2} / \text{s}^{-1}$ | $k_3 / \text{M}^{-1}\text{s}^{-1}$ | $k_{-3} / \text{s}^{-1}$ |            |
|--------|-------------------------------------------------------|-------------------------------------------------------|--------------------------|------------------------------------|--------------------------|------------------------------------|--------------------------|------------|
| 5'-GMP | 10                                                    | $1.0 \pm 0.1$                                         |                          |                                    |                          |                                    |                          |            |
|        | 15                                                    | $1.6 \pm 0.1$                                         |                          |                                    |                          |                                    |                          |            |
|        | 20                                                    | $2.6 \pm 0.1$                                         |                          | $0.19 \pm 0.02$                    |                          |                                    |                          |            |
|        | 25                                                    | $3.7 \pm 0.1$                                         |                          | $0.28 \pm 0.01$                    |                          |                                    |                          |            |
|        | 30                                                    | $4.7 \pm 0.6$                                         |                          | $0.40 \pm 0.01$                    |                          |                                    |                          |            |
|        |                                                       | $\Delta H^\ddagger / \text{kJ mol}^{-1}$              | $51 \pm 3$               |                                    | $52 \pm 4$               |                                    |                          |            |
|        | $\Delta S^\ddagger / \text{J K}^{-1} \text{mol}^{-1}$ | $-7 \pm 9$                                            |                          | $-80 \pm 14$                       |                          |                                    |                          |            |
| L-Met  | 5                                                     | $35 \pm 3$                                            | $23 \pm 11$              | $81 \pm 19$                        | $1.8 \pm 0.1$            |                                    |                          |            |
|        | 10                                                    | $40 \pm 5$                                            | $45 \pm 30$              | $112 \pm 42$                       | $2.1 \pm 0.4$            |                                    |                          |            |
|        | 15                                                    | $50 \pm 2$                                            | $56 \pm 17$              | $132 \pm 19$                       | $2.8 \pm 0.1$            |                                    |                          |            |
|        | 20                                                    | $62 \pm 5$                                            | $80 \pm 31$              | $168 \pm 21$                       | $3.3 \pm 0.1$            |                                    |                          |            |
|        |                                                       | $\Delta H^\ddagger / \text{kJ mol}^{-1}$              | $21 \pm 3$               | –                                  | $30 \pm 3$               | $33 \pm 5$                         |                          |            |
|        |                                                       | $\Delta S^\ddagger / \text{J K}^{-1} \text{mol}^{-1}$ | $-78 \pm 11$             | –                                  | $-99 \pm 11$             | $-122 \pm 18$                      |                          |            |
| tu     | 5                                                     | $73 \pm 8$                                            |                          |                                    |                          |                                    |                          |            |
|        | 20                                                    |                                                       |                          | $84 \pm 5$                         | $0.12 \pm 0.07$          | $6.4 \pm 0.9$                      | $0.034 \pm 0.008$        |            |
|        | 25                                                    |                                                       |                          | $106 \pm 2$                        | $0.35 \pm 0.03$          | $7.8 \pm 0.5$                      | $0.038 \pm 0.005$        |            |
|        | 30                                                    |                                                       |                          | $146 \pm 5$                        | $0.43 \pm 0.08$          | $8.2 \pm 0.9$                      | $0.041 \pm 0.008$        |            |
|        | 35                                                    |                                                       |                          | $193 \pm 8$                        | $0.92 \pm 0.12$          | $8.8 \pm 0.9$                      | $0.048 \pm 0.007$        |            |
|        |                                                       | $\Delta H^\ddagger / \text{kJ mol}^{-1}$              | –                        |                                    | $39 \pm 3$               | –                                  | $13 \pm 3$               | $15 \pm 3$ |
|        | $\Delta S^\ddagger / \text{J K}^{-1} \text{mol}^{-1}$ | –                                                     |                          | $-75 \pm 9$                        | –                        | $-185 \pm 9$                       | $-223 \pm 9$             |            |

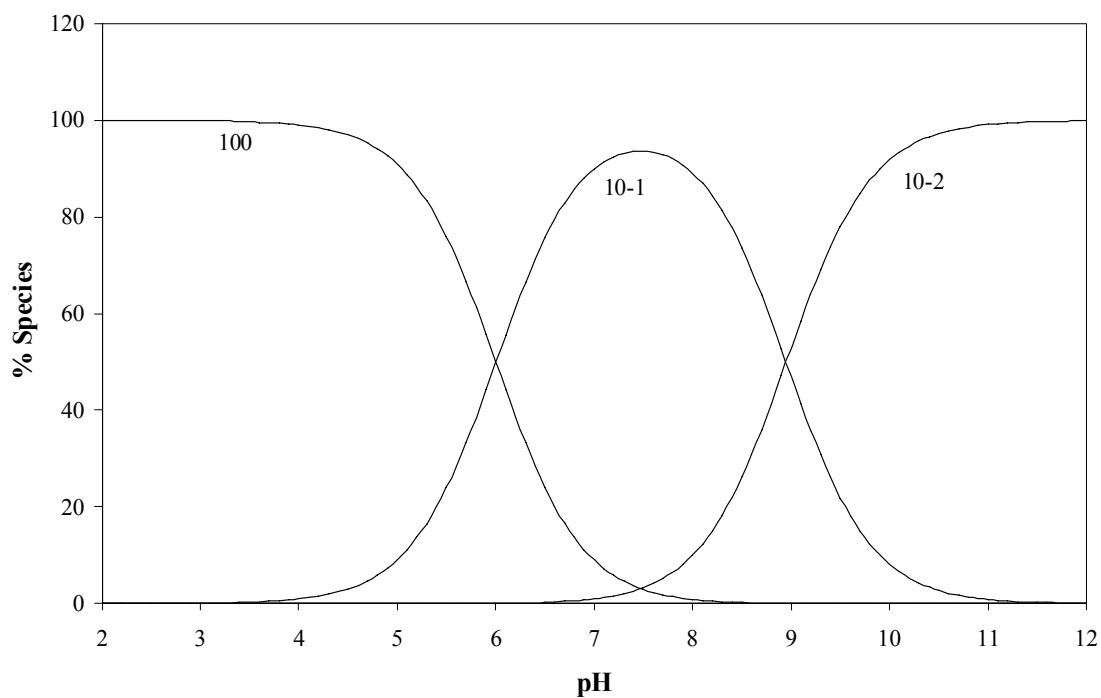

**Figure S1.** Concentration distribution of various species for  $[\text{Pd}(\text{Pip})(\text{H}_2\text{O})_2]^{2+}$  as a function of pH.

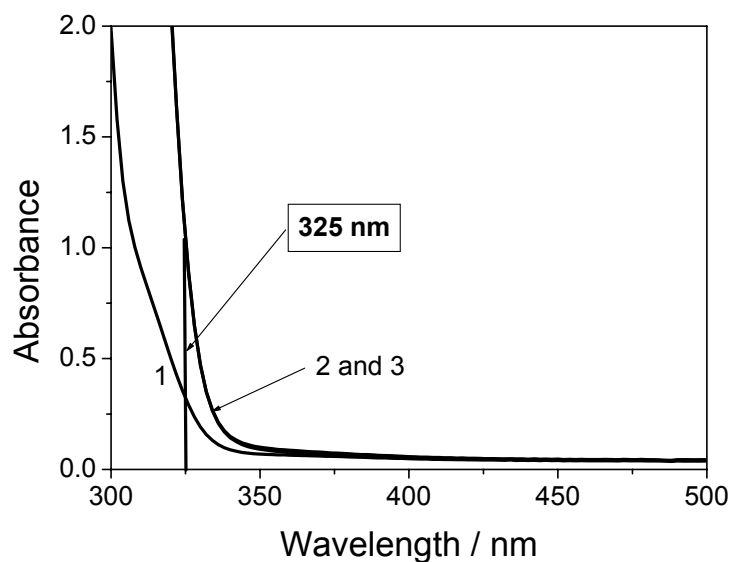

**Figure S2 .** UV-Vis spectra for the reaction of  $[\text{Pd}(\text{Pip})(\text{H}_2\text{O})_2]^{2+}$  with  $5'\text{-GMP}^-$  recorded before (1) and after 0.25 (2) and 30 min (3) following mixing of the reactants. Experimental conditions:  $[\text{Pd}(\text{II})] = 0.5 \text{ mM}$ ,  $[5'\text{-GMP}]_{\text{Tot}} = 0.01 \text{ M}$ ,  $I = 0.1 \text{ M}$ ,  $T = 25 \text{ }^\circ\text{C}$ .

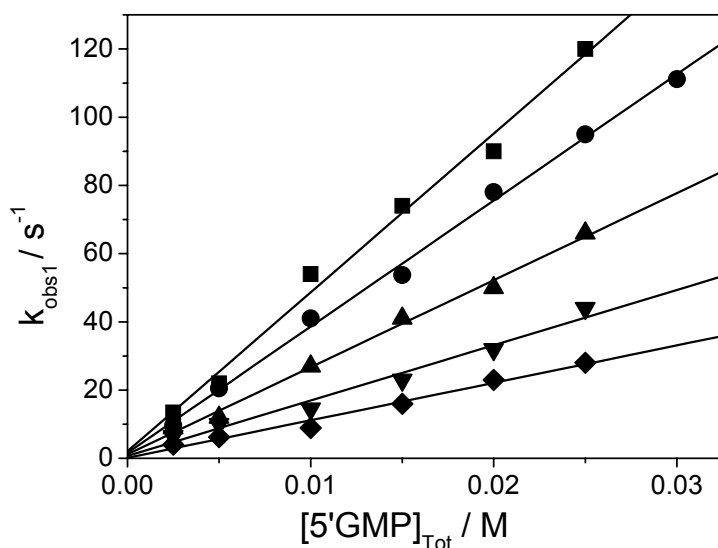

**Figure S3.** Concentration and temperature dependence for the first step of the reaction of  $[\text{Pd}(\text{Pip})(\text{H}_2\text{O})_2]^{2+}$  with  $5'$ -GMP $^-$ . Experimental conditions:  $[\text{Pd}(\text{II})] = 0.25 \text{ mM}$ ,  $[5'$ -GMP] $_{\text{Tot}} = 2.5 - 25 \text{ mM}$ ,  $I = 0.1 \text{ M}$ ,  $\text{pH} = 5.3\text{-}5.6$ ,  $T = 10 - 30 \text{ }^\circ\text{C}$  (every  $5^\circ\text{C}$ ).

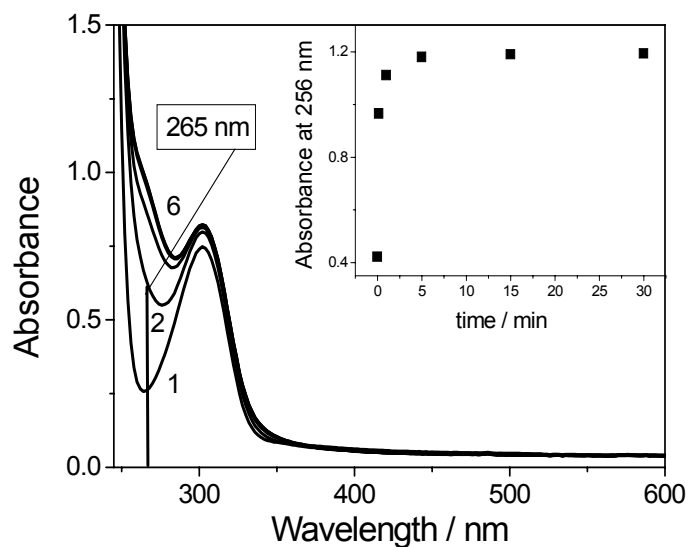

**Figure S4.** UV-Vis spectra for the reaction of  $[\text{Pd}(\text{Pip})(\text{H}_2\text{O})_2]^{2+}$  with L-Met recorded before (1) and after 0.25 (2), 1 (3), 5 (4) 15 (5) and 30 min (6) following mixing of the reactants. Experimental conditions:  $[\text{Pd}(\text{II})] = 0.5 \text{ mM}$ ,  $[\text{L-Met}] = 0.01 \text{ M}$ ,  $I = 0.1 \text{ M}$ ,  $T = 25 \text{ }^\circ\text{C}$ .

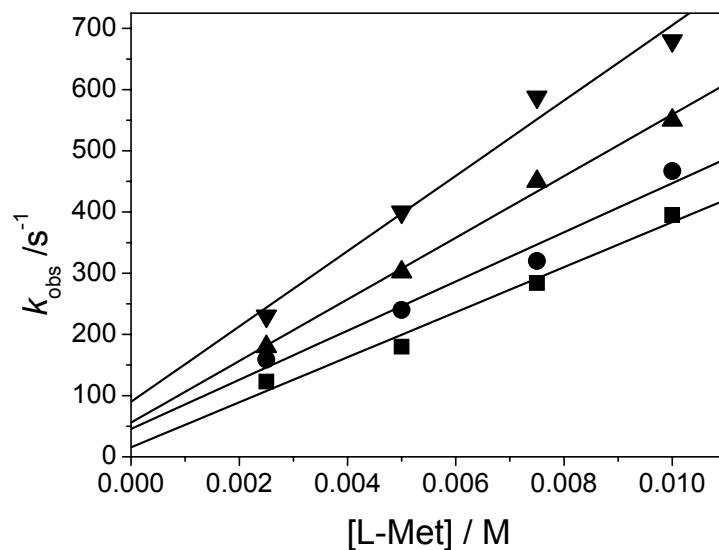

**Figure S5.** Concentration and temperature dependence for the first step of the reaction of  $[\text{Pd}(\text{Pip})(\text{H}_2\text{O})_2]^{2+}$  with L-Met. Experimental conditions:  $[\text{Pd}(\text{II})] = 0.25 \text{ mM}$ ,  $[\text{L-Met}] = 2.5 - 10 \text{ mM}$ ,  $I = 0.1 \text{ M}$ ,  $\text{pH} = 3.5$ ,  $T = 5 - 20 \text{ }^\circ\text{C}$  (every  $5^\circ\text{C}$ ).

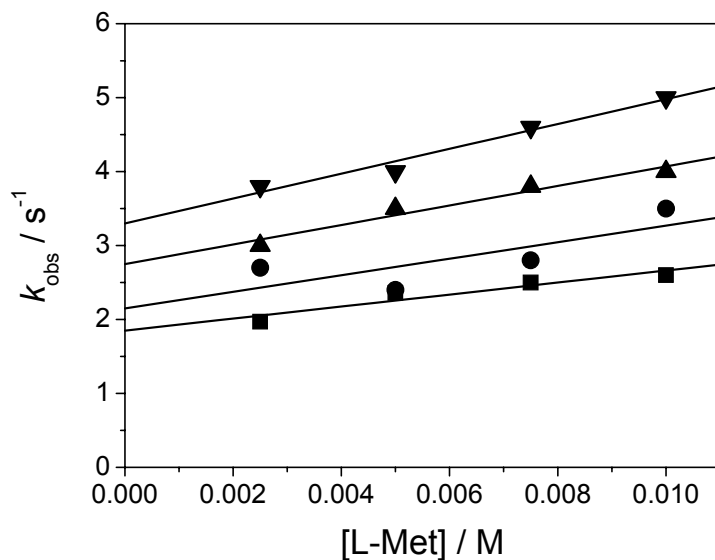

**Figure S6.** Concentration and temperature dependence for the second step of the reaction of  $[\text{Pd}(\text{Pip})(\text{H}_2\text{O})_2]^{2+}$  with L-Met. Experimental conditions:  $[\text{Pd}(\text{II})] = 0.25 \text{ mM}$ ,  $[\text{L-Met}] = 2.5 - 10 \text{ mM}$ ,  $I = 0.1 \text{ M}$ ,  $\text{pH} = 3.5$ ,  $T = 5 - 20 \text{ }^\circ\text{C}$  (every  $5^\circ\text{C}$ ).

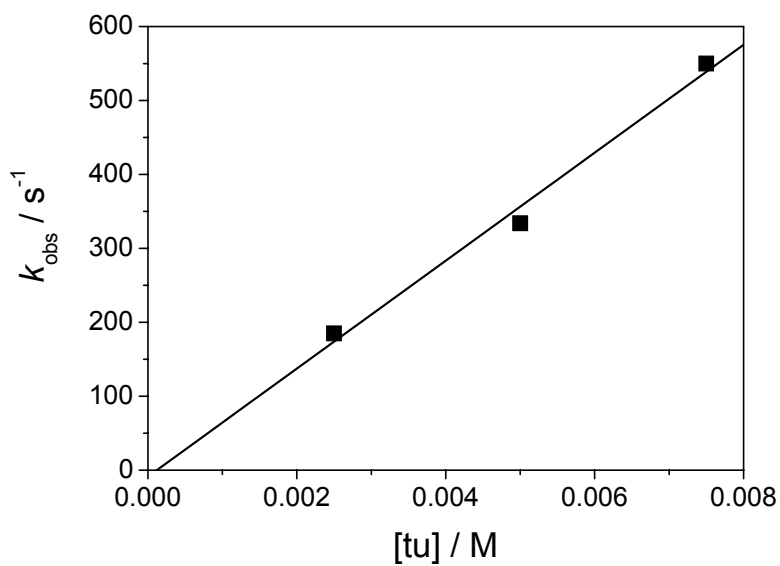

**Figure S7.** Concentration dependence for the first step of the reaction of  $[\text{Pd}(\text{Pip})(\text{H}_2\text{O})_2]^{2+}$  with tu. Experimental conditions:  $[\text{Pd}(\text{II})] = 0.25 \text{ mM}$ ,  $[\text{L-Met}] = 5 - 30 \text{ mM}$ ,  $I = 0.1 \text{ M}$ ,  $\text{pH} = 3.7$ ,  $T = 5 \text{ }^\circ\text{C}$ .

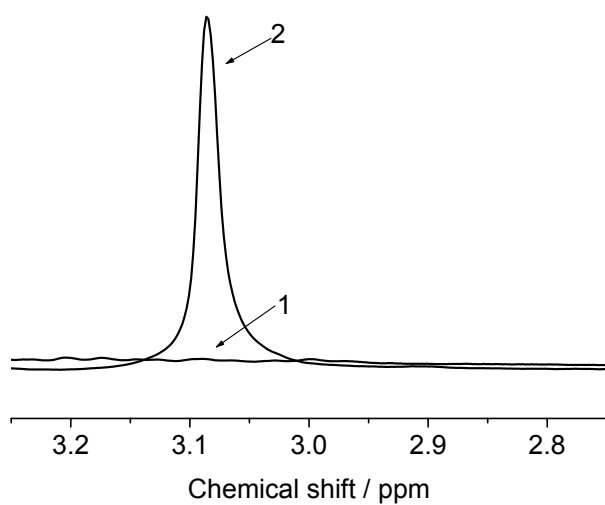

**Figure S8.** Selected region of the  $^1\text{H}$  NMR spectrum of  $[\text{Pd}(\text{Pip})(\text{D}_2\text{O})_2]^{2+}$  ( $\text{D}_2\text{O}$  solution) before (1) and after (2) addition of tu. The new resonance at 3.08 ppm is attributed to  $\text{CH}_2$  groups of free piperazine. Experimental conditions:  $[\text{Pd}(\text{II})] = 0.017 \text{ M}$ ,  $[\text{tu}] = 0.07 \text{ M}$ ,  $T = 25 \text{ }^\circ\text{C}$ .

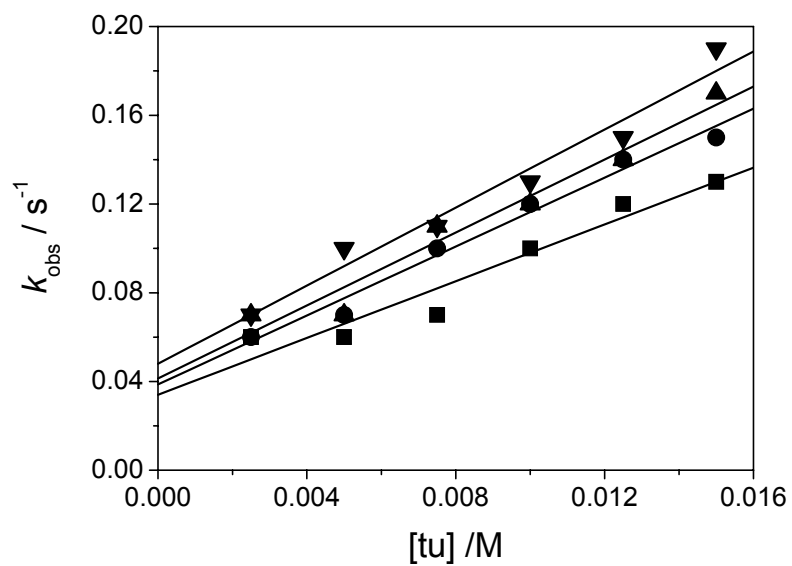

**Figure S9.** Concentration and temperature dependence for the third step of the reaction of  $[\text{Pd}(\text{Pip})(\text{H}_2\text{O})_2]^{2+}$  with tu.  $[\text{Pd}(\text{II})] = 0.25 \text{ mM}$ ,  $[\text{tu}] = 2.5 - 30 \text{ mM}$ ,  $I = 0.1 \text{ M}$ ,  $\text{pH} = 3.7$ ,  $T = 20 - 35 \text{ }^\circ\text{C}$  (every  $5^\circ\text{C}$ ).
